# Supplementary figures and images for: Two pore domain potassium channels in cerebral ischemia: a focus on K2P9.1 (TASK3, KCNK9)
Source: Springer Nature journal article supplement (doi:10.1186/2040-7378-2-14), 2010-07-20

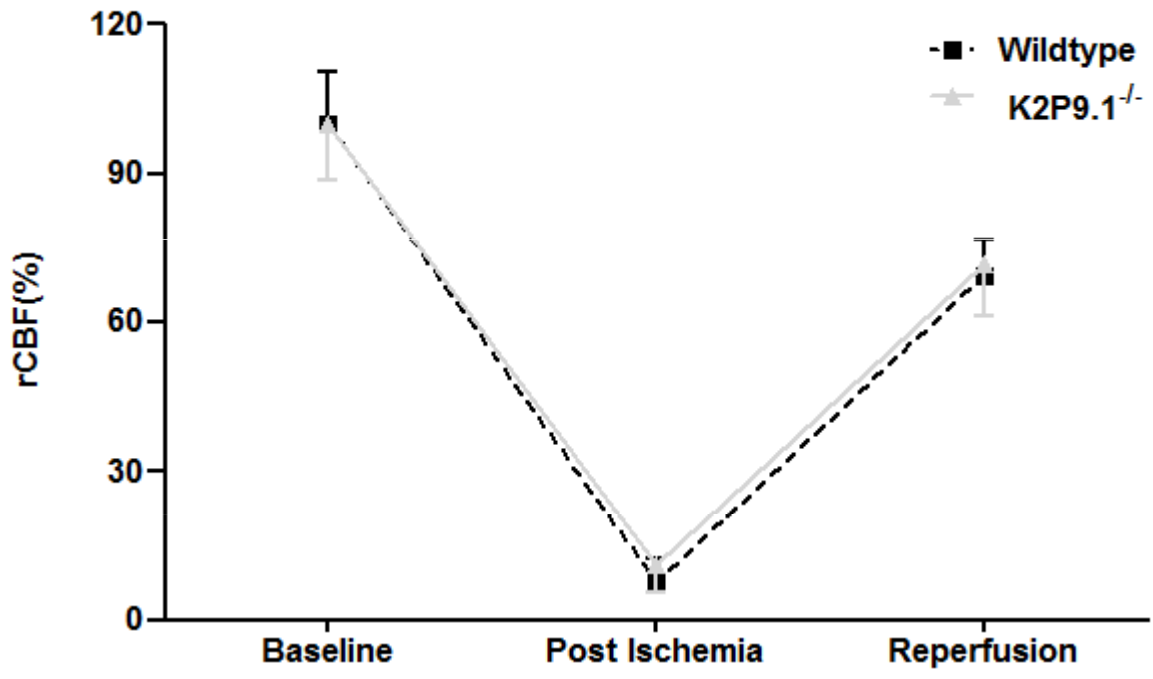

Supplement: Additional file 1 [file 2040-7378-2-14-s1.pdf]
